# Supplementary material for: Gender- and region-specific changes in estrogen signaling in aging rat brain mitochondria
Source: publisher site journal article supplement (doi:10.18632/aging.101538), 2018-08-31
Supplement: Supplementary file [file aging-v10i8-101538-supplementary-material-SD1.pdf]

## SUPPLEMENTARY TABLE

**Supplementary Table 1.**

| <b>Aging Stage</b> | <b>Rat Age</b>      | <b>Human Age</b> |
|--------------------|---------------------|------------------|
| Adolescent         | 0-6 weeks           | 0-12 years       |
| Puberty            | 5-8 weeks           | 12-18 years      |
| Young Adult        | 8 weeks – 11 months | 18-40 years      |
| Middle-Aged Adult  | 11-15 months        | 50-60 years      |
| Elderly            | Past 15 months      | Past 60 years    |
